# Supplementary material for: Building Brand Awareness in Dynamic Oligopoly Markets
Source: Atypon-hosted journal article supplement (doi:10.1287/mnsc.1070.0755), 2008-01-01
Supplement: mnsc.1070.0755-sm-ec.pdf [file mnsc.1070.0755-sm-ec.pdf]

**e - c o m p a n i o n**

ONLY AVAILABLE IN ELECTRONIC FORM

Electronic Companion—“Building Brand Awareness in Dynamic Oligopoly Markets” by Prasad A. Naik, Ashutosh Prasad, and Suresh P. Sethi, *Management Science*, doi 10.1287/mnsc.1070.0755.

---

## Proofs of Statements

Below we provide the proofs for Propositions 1-4, and derive Equation (24) which gives an upper bound for the number of brands.

### EC.1. Proof of Proposition 1.

PROPOSITION 1. Maximizing (12) subject to (4), the optimal closed-loop advertising strategy of brand  $i \in I$  is

$$u_i^* = \frac{\sqrt{M - A_i}}{2} \left( (\rho_i + \xi_{ii})\phi_i^i - \sum_{k=1}^N \xi_{ki}\phi_k^i \right), \quad (13)$$

and its value function

$$V_i = \sum_{j=1}^N \phi_j^i A_j, \quad (14)$$

where the coefficients  $\phi_j^i$  are obtained from the following relations:

$$r\phi_i^i = m_i + \sum_{j \in I, j \neq i} \frac{1}{2} \left( (\rho_j + \xi_{jj})\phi_j^j - \sum_{k \in I} \xi_{kj}\phi_k^j \right) \left( (\rho_j + \xi_{jj})\phi_j^i - \sum_{k \in I} \xi_{kj}\phi_k^i \right). \quad (15)$$

$$\begin{aligned} r\phi_j^i &= -\frac{1}{4} \left( (\rho_i + \xi_{ii})\phi_i^i - \sum_{k \in I} \xi_{ki}\phi_k^i \right)^2 \\ &+ \sum_{s \in I, s \neq j} \frac{1}{2} \left( (\rho_s + \xi_{ss})\phi_s^s - \sum_{k \in I} \xi_{ks}\phi_k^s \right) \left( (\rho_s + \xi_{ss})\phi_s^i - \sum_{k \in I} \xi_{ks}\phi_k^i \right), j \neq i. \end{aligned} \quad (16)$$

#### EC.1.1. Proof of the Main Result

*Proof of Proposition 1.* The objective for brand  $i \in I = \{1, 2, \dots, N\}$  is

$$\text{Max}_{u_i(t)} \int_0^{\infty} e^{-rt} (m_i A_i(t) - u_i(t)^2) dt, \quad (A1)$$

$$\text{s.t.} \quad \frac{dA_i(t)}{dt} = \rho_i u_i(t) \sqrt{M(t) - A_i(t)} - \sum_{\substack{j=1 \\ j \neq i}}^N \xi_{ij} u_j(t) \sqrt{M(t) - A_j(t)}, \quad i \in I, \quad (A2)$$

$$\text{where } M(t) \equiv \sum_{i=1}^N A_i(t). \quad (\text{A3})$$

We shall drop the time subscripts hereafter. Note that (A2) can be rewritten as

$$\frac{dA_i}{dt} = (\rho_i + \xi_{ii})u_i\sqrt{M - A_i} - \sum_{j=1}^N \xi_{ij}u_j\sqrt{M - A_j}, \quad i \in I. \quad (\text{A2}')$$

The Hamilton-Jacobi-Bellman (HJB) equation for brand  $i$  is given by

$$rV_i = \max_{u_i} m_i A_i - u_i^2 + \sum_{k=1}^N \left\{ \frac{\partial V_i}{\partial A_k} \left( (\rho_k + \xi_{kk})u_k\sqrt{M - A_k} - \sum_{j=1}^N \xi_{kj}u_j\sqrt{M - A_j} \right) \right\}. \quad (\text{A4})$$

This can be rewritten to make it simpler. First, note that the term

$$\sum_{k=1}^N \frac{\partial V_i}{\partial A_k} (\rho_k + \xi_{kk})u_k\sqrt{M - A_k} \text{ can be written as } \sum_{j=1}^N \frac{\partial V_i}{\partial A_j} (\rho_j + \xi_{jj})u_j\sqrt{M - A_j}.$$

Second, note the following transformation:

$$\begin{aligned} & \sum_{k=1}^N \left\{ \frac{\partial V_i}{\partial A_k} \sum_{j=1}^N \xi_{kj}u_j\sqrt{M - A_j} \right\} \\ &= \sum_{k=1}^N \sum_{j=1}^N \frac{\partial V_i}{\partial A_k} \xi_{kj}u_j\sqrt{M - A_j} \\ &= \sum_{j=1}^N \sum_{k=1}^N \frac{\partial V_i}{\partial A_k} \xi_{kj}u_j\sqrt{M - A_j} \\ &= \sum_{j=1}^N u_j\sqrt{M - A_j} \sum_{k=1}^N \frac{\partial V_i}{\partial A_k} \xi_{kj} \end{aligned}$$

Putting these into (A4) yields

$$rV_i = \max_{u_i} m_i A_i - u_i^2 + \sum_{j=1}^N \frac{\partial V_i}{\partial A_j} (\rho_j + \xi_{jj})u_j\sqrt{M - A_j} - \sum_{j=1}^N u_j\sqrt{M - A_j} \sum_{k=1}^N \frac{\partial V_i}{\partial A_k} \xi_{kj} \quad (\text{A5})$$

which can be rewritten as

$$rV_i = \max_{u_i} m_i A_i - u_i^2 + \sum_{j \in I} u_j\sqrt{M - A_j} \left( (\rho_j + \xi_{jj}) \frac{\partial V_i}{\partial A_j} - \sum_{k \in I} \xi_{kj} \frac{\partial V_i}{\partial A_k} \right). \quad (\text{A6})$$

We equate the derivative of the RHS to zero and obtain the optimal feedback control

$$u_i^* = \frac{\sqrt{M - A_i}}{2} \left( (\rho_i + \xi_{ii}) \frac{\partial V_i}{\partial A_i} - \sum_{k \in I} \xi_{ki} \frac{\partial V_i}{\partial A_k} \right), \quad \forall i \in I. \quad (\text{A7})$$

Assuming that the controls are positive, we insert these controls into the HJB equations to obtain

$$\begin{aligned} rV_i = & m_i A_i - \frac{(M - A_i)}{4} \left( (\rho_i + \xi_{ii}) \frac{\partial V_i}{\partial A_i} - \sum_{k \in I} \xi_{ki} \frac{\partial V_i}{\partial A_k} \right)^2 \\ & + \sum_{j \in I} \frac{(M - A_j)}{2} \left( (\rho_j + \xi_{jj}) \frac{\partial V_j}{\partial A_j} - \sum_{k \in I} \xi_{kj} \frac{\partial V_j}{\partial A_k} \right) \left( (\rho_j + \xi_{jj}) \frac{\partial V_i}{\partial A_j} - \sum_{k \in I} \xi_{kj} \frac{\partial V_i}{\partial A_k} \right). \end{aligned} \quad (\text{A8})$$

To solve these  $N$  simultaneous partial differential equations, we use the following linear value functions, observing that they satisfy the Hamilton-Jacobi equations,

$$V_i = \sum_{j=1}^N \phi_j^i A_j, \quad \forall i \in I. \quad (\text{A9})$$

Thus, there are a total of  $N$  unknown parameters (the  $\phi_j^i$ s) for each of the  $N$  firms. To determine these parameters, we insert (A9) into the Hamilton-Jacobi equation and obtain,  $\forall i \in I$ ,

$$\begin{aligned} r \sum_{j=1}^N \phi_j^i A_j = & m_i A_i - \frac{(M - A_i)}{4} \left( (\rho_i + \xi_{ii}) \phi_i^i - \sum_{k \in I} \xi_{ki} \phi_k^i \right)^2 \\ & + \sum_{j \in I} \frac{(M - A_j)}{2} \left( (\rho_j + \xi_{jj}) \phi_j^j - \sum_{k \in I} \xi_{kj} \phi_k^j \right) \left( (\rho_j + \xi_{jj}) \phi_j^i - \sum_{k \in I} \xi_{kj} \phi_k^i \right). \end{aligned} \quad (\text{A10})$$

Recalling that  $M(t) \equiv \sum_{i \in I} A_i(t)$ , we equate the  $A_i$  terms on both sides of this equation.

$$\begin{aligned} r\phi_i^i = & m_i + \sum_{j \in I, j \neq i} \frac{1}{2} \left( (\rho_j + \xi_{jj}) \phi_j^j - \sum_{k \in I} \xi_{kj} \phi_k^j \right) \left( (\rho_j + \xi_{jj}) \phi_j^i - \sum_{k \in I} \xi_{kj} \phi_k^i \right). \\ r\phi_j^i = & -\frac{1}{4} \left( (\rho_i + \xi_{ii}) \phi_i^i - \sum_{k \in I} \xi_{ki} \phi_k^i \right)^2 \\ & + \sum_{s \in I, s \neq j} \frac{1}{2} \left( (\rho_s + \xi_{ss}) \phi_s^s - \sum_{k \in I} \xi_{ks} \phi_k^s \right) \left( (\rho_s + \xi_{ss}) \phi_s^i - \sum_{k \in I} \xi_{ks} \phi_k^i \right), \quad j \neq i. \end{aligned}$$

We get such relationships for each of the  $N$  brands in  $I$ , which are to be solved simultaneously for the unknown coefficients.

## EC.2. Proof of Proposition 2.

PROPOSITION 2. In mature markets, a brand's optimal closed-loop advertising strategy is

$$u_i^* = \frac{\rho_i \sqrt{1 - A_i}}{2(N-1)} \left( N\phi_i^i - \sum_{j=1}^N \phi_j^i \right), \quad (17)$$

and its value function

$$V_i = \phi_0^i + \sum_{j=1}^N \phi_j^i A_j, \quad \forall i \in I, \quad (18)$$

where the coefficients  $(\phi_0^i, \phi_j^i)$  are obtained from the following  $(N+1)$  relations:

$$r \left( \sum_{j=0}^N \phi_j^i \right) = m_i, \quad (19)$$

$$r\phi_i^i = m_i - \frac{\rho_i^2}{4(N-1)^2} \left( N\phi_i^i - \sum_{k \in I} \phi_k^i \right)^2, \quad (20)$$

$$r\phi_j^i = -\frac{\rho_j^2}{2(N-1)^2} \left( N\phi_j^j - \sum_{k \in I} \phi_k^j \right) \left( N\phi_j^i - \sum_{k \in I} \phi_k^i \right), \quad \forall j \in I, j \neq i. \quad (21)$$

### EC.2.1. Proof of the Main Result

*Proof of Proposition 2.* The Hamilton-Jacobi-Bellman (HJB) equation for brand  $i$  is given by

$$rV_i = \max_{u_i} m_i A_i - u_i^2 + \sum_{j \in I} \frac{\partial V_i}{\partial A_j} \left( \frac{N}{N-1} \rho_j u_j \sqrt{1 - A_j} - \frac{1}{N-1} \sum_{k \in I} \rho_k u_k \sqrt{1 - A_k} \right), \quad (B1)$$

which can be rewritten as

$$rV_i = \max_{u_i} m_i A_i - u_i^2 + \sum_{j \in I} \frac{\rho_j u_j \sqrt{1 - A_j}}{N-1} \left( N \frac{\partial V_i}{\partial A_j} - \sum_{k \in I} \frac{\partial V_i}{\partial A_k} \right). \quad (B2)$$

We obtain the optimal feedback controls

$$u_i^* = \frac{\rho_i \sqrt{1 - A_i}}{2(N-1)} \left( N \frac{\partial V_i}{\partial A_i} - \sum_{k \in I} \frac{\partial V_i}{\partial A_k} \right), \quad \forall i \in I. \quad (B3)$$

Assuming that the controls are positive, we insert these controls into the HJB equations to obtain

$$\begin{aligned}
rV_i &= m_i A_i - \frac{\rho_i^2 (1 - A_i)}{4(N-1)^2} \left( N \frac{\partial V_i}{\partial A_i} - \sum_{k \in I} \frac{\partial V_i}{\partial A_k} \right)^2 \\
&+ \sum_{j \in I} \frac{\rho_j^2 (1 - A_j)}{2(N-1)^2} \left( N \frac{\partial V_j}{\partial A_j} - \sum_{k \in I} \frac{\partial V_j}{\partial A_k} \right) \left( N \frac{\partial V_i}{\partial A_j} - \sum_{k \in I} \frac{\partial V_i}{\partial A_k} \right).
\end{aligned} \tag{B4}$$

To solve these  $N$  simultaneous partial differential equations, we use the following linear value functions, observing that they satisfy the Hamilton-Jacobi equations,

$$V_i = \phi_0^i + \sum_{j=1}^N \phi_j^i A_j, \quad \forall i \in I. \tag{B5}$$

To determine the unknown parameters, we insert (B5) into (B4) and obtain,  $\forall i \in I$ ,

$$\begin{aligned}
r(\phi_0^i + \sum_{j=1}^N \phi_j^i A_j) &= m_i A_i - \frac{\rho_i^2 (1 - A_i)}{4(N-1)^2} \left( N \phi_i^i - \sum_{k \in I} \phi_k^i \right)^2 \\
&+ \sum_{j \in I} \frac{\rho_j^2 (1 - A_j)}{2(N-1)^2} \left( N \phi_j^j - \sum_{k \in I} \phi_k^j \right) \left( N \phi_j^i - \sum_{k \in I} \phi_k^i \right)
\end{aligned} \tag{B6}$$

$$\begin{aligned}
\Rightarrow r \left( \sum_{j=0}^N \phi_j^i - \sum_{j=1}^N \phi_j^i (1 - A_j) \right) &= m_i - m_i (1 - A_i) - \frac{\rho_i^2 (1 - A_i)}{4(N-1)^2} \left( N \phi_i^i - \sum_{k \in I} \phi_k^i \right)^2 \\
&+ \sum_{j \in I} \frac{\rho_j^2 (1 - A_j)}{2(N-1)^2} \left( N \phi_j^j - \sum_{k \in I} \phi_k^j \right) \left( N \phi_j^i - \sum_{k \in I} \phi_k^i \right).
\end{aligned} \tag{B7}$$

Equating the powers of  $(1 - A_i)$ , we get

$$r \left( \sum_{j=0}^N \phi_j^i \right) = m_i, \tag{B8}$$

$$r \phi_i^i = m_i - \frac{\rho_i^2}{4(N-1)^2} \left( N \phi_i^i - \sum_{k \in I} \phi_k^i \right)^2, \tag{B9}$$

$$r \phi_j^i = - \frac{\rho_j^2}{2(N-1)^2} \left( N \phi_j^j - \sum_{k \in I} \phi_k^j \right) \left( N \phi_j^i - \sum_{k \in I} \phi_k^i \right), \forall j \in I, j \neq i. \tag{B10}$$

These  $N + 1$  relationships are obtained for each of the  $N$  brands in  $I$ , thereby resulting in  $N(N + 1)$  equations to be solved for the  $N(N + 1)$  unknown coefficients.

### EC.3. Proof of Proposition 3.

PROPOSITION 3. For each brand in a mature market, the equilibrium share is given by

$$\bar{A}_i = 1 - \frac{N-1}{B_i \times \sum_{j=1}^N B_j^{-1}}, \quad \forall i \in I, \quad (22)$$

$$\text{where } B_i = \frac{\rho_i^2}{2(N-1)} \left( N\phi_i^i - \sum_{j=1}^N \phi_j^i \right).$$

#### EC.3.1. Proof of the Main Result

*Proof of Proposition 3.* We insert the optimal controls into the dynamic equations to get

$$\frac{dA_i}{dt} = N(1-A_i)B_i - \sum_{j \in I} (1-A_j)B_j, \quad \forall i \in I, \quad (C1)$$

where  $B_i \equiv \frac{\rho_i^2}{2(N-1)^2} (N\phi_i^i - \sum_{k \in I} \phi_k^i)$ . To find the steady state market shares, we solve  $\frac{dA_i}{dt} = 0$ . Let

$\bar{A}_i$  denote the awareness share in steady state for brand  $i$ . It follows from (C1) that

$$\begin{aligned} 1 - \bar{A}_i &= \frac{1}{NB_i} \sum_{j \in I} (1 - \bar{A}_j)B_j & (C2) \\ \Rightarrow \sum_{i \in I} (1 - \bar{A}_i) &= \sum_{i \in I} \frac{1}{NB_i} \sum_{j \in I} (1 - \bar{A}_j)B_j \\ \Rightarrow \frac{N-1}{\sum_{i \in I} \frac{1}{B_i}} &= \frac{1}{N} \sum_{j \in I} (1 - \bar{A}_j)B_j \\ \Rightarrow \frac{N-1}{B_i \sum_{i \in I} \frac{1}{B_i}} &= \frac{1}{NB_i} \sum_{j \in I} (1 - \bar{A}_j)B_j \end{aligned}$$

Inserting the last expression back into (C2), we obtain the desired result:

$$\bar{A}_i = 1 - \frac{N-1}{B_i \sum_{j \in I} \frac{1}{B_j}}, \quad \forall i \in I. \quad (C3)$$

## EC.4. Proof of Proposition 4.

PROPOSITION 4. In mature markets, the category ad spending increases as the number of brands increases.

### EC.4.1. Proof of the Main Result

*Proof of Proposition 4.* From Proposition 2, the value function is  $V_i = \phi_0 + \phi_1 A_i + \sum_{j \neq i} \phi_2 A_j$  for symmetric

brands, where  $\forall i \in I$ ,  $\phi_0^i = \phi_0$ ,  $\phi_1^i = \phi_1$ ,  $\phi_2^i (\forall j \neq i) = \phi_2$ . To determine  $(\phi_0, \phi_1, \phi_2)$  in terms of the

model parameters, we apply Proposition 2 to get the relations:

$$r(\phi_0 + \phi_1 + (N-1)\phi_2) = m, \quad (\text{D1})$$

$$r\phi_1 = m - \frac{\rho^2(\phi_1 - \phi_2)^2}{4}, \quad (\text{D2})$$

$$r\phi_2 = \frac{\rho^2(\phi_1 - \phi_2)^2}{2(N-1)}. \quad (\text{D3})$$

Subtracting (D3) from (D2), we get a quadratic equation in  $(\phi_1 - \phi_2)$ , whose roots are given by

$$\phi_1 - \phi_2 = \left( \pm \sqrt{r^2 + \frac{m\rho^2(N+1)}{N-1}} - r \right) / \left( \frac{\rho^2(N+1)}{2(N-1)} \right). \quad (\text{D4})$$

Because the value function  $V_i = \phi_0 + \phi_1 A_i + \sum_{j \neq i} \phi_2 A_j$  can be written as  $V_i = (\phi_0 + \phi_2) + (\phi_1 - \phi_2)A_i$  after

using the identity  $\sum_{j \neq i} A_j = 1 - A_i$ , we expect  $\phi_1 - \phi_2 > 0$ , and so only the positive root should be used.

Further simplification thus yields

$$\phi_1 - \phi_2 = \frac{2m}{r + \sqrt{r^2 + \frac{m\rho^2(N+1)}{N-1}}} > 0. \quad (\text{D5})$$

Next, we express  $(\phi_0, \phi_1, \phi_2)$  in terms of  $(\phi_1 - \phi_2)$  because the latter term depends only on model parameters via (D5). To this end, we multiply (D2) by 2 and (D3) by  $N-1$  and add them to obtain

$$\begin{aligned}
2\phi_1 + (N-1)\phi_2 &= 2m/r \\
\Rightarrow \phi_2 &= \frac{2}{N+1} \left( \frac{m}{r} - (\phi_1 - \phi_2) \right) \\
\Rightarrow \phi_1 &= \frac{1}{N+1} \left( \frac{2m}{r} + (N-1)(\phi_1 - \phi_2) \right)
\end{aligned} \tag{D6}$$

and

$$\phi_0 = \frac{m}{r} - \frac{1}{N+1} \left( \frac{2mN}{r} - (N-1)(\phi_1 - \phi_2) \right), \tag{D7}$$

after substituting  $\phi_1$  and  $\phi_2$  from (D6) into (D1).

Finally, because  $u^* = \frac{\rho\sqrt{1-A}}{2}(\phi_1 - \phi_2)$  from Proposition 2 and  $\frac{\partial(\phi_1 - \phi_2)}{\partial N} > 0$  from (D5), we

find that  $\frac{\partial u^*}{\partial N} > 0$ . Hence, the total category advertising  $Nu^*$  increases with the number of brands.

## EC.5. Derivation of an Upper Bound for N.

REMARK 5.1. We obtain an upper bound

$$N^* = 3 + \frac{2r}{\sqrt{r^2 + m\rho^2} - r}, \tag{24}$$

which reveals that product categories will sustain three (or more) brands.

### EC.5.1. Derivation of the Main Result

*Derivation of Upper Bound.* The total category value is

$$\sum_{i \in \mathbf{I}} V_i = \sum_{i \in \mathbf{I}} ((\phi_0 + \phi_2) + (\phi_1 - \phi_2)A_i) = N(\phi_0 + \phi_2) + (\phi_1 - \phi_2). \tag{E1}$$

Although  $\phi_1 - \phi_2 > 0$  from (D5), the term  $(\phi_0 + \phi_2)$  can become negative as the number of brands increases. Hence, the product category can sustain only a limited number of brands before a shakeout occurs when some brands do not advertise, letting awareness to decline to zero, and exiting the market. To determine the sustainable number of brands, we first observe that

$$\sum_{i \in I} V_i = \int_0^{\infty} e^{-rt} (m - \sum_{i \in I} u_i^*(t)^2) dt = \frac{m}{r} - \frac{\rho^2 (\phi_1 - \phi_2)^2 (N-1)}{4r} \geq 0. \quad (\text{E2})$$

Next, inserting  $(\phi_1 - \phi_2)$  from (D5) into (E2) and simplifying the algebra, we obtain the condition:

$$\begin{aligned} \frac{m\rho^2 N(3-N)}{N-1} + 2r(r + \sqrt{r^2 + \frac{m\rho^2(N+1)}{N-1}}) &\geq 0 \\ \Rightarrow N(3-N) + \frac{2(N+1)}{\sqrt{1 + \frac{m\rho^2(N+1)}{r^2(N-1)}} - 1} &\geq 0. \end{aligned} \quad (\text{E3})$$

It is easy to see that for  $N \leq 3$  condition (E3) is satisfied. It also reveals that an upper bound on  $N$  that satisfies (E3) is given by

$$N^* = 3 + \frac{2}{\sqrt{1 + \frac{m\rho^2}{r^2}} - 1}. \quad (\text{E4})$$
